# 1 The Intervening Domain Is Required For DNA-binding and Functional Identity of Plant 2 MADS Transcription Factors

3  
4 Xuelei Lai<sup>1,\*</sup>, Rosario Vega-Leon<sup>2,\*</sup>, Veronique Hugouvieux<sup>1,\*,#</sup>, Romain Blanc-Mathieu<sup>1</sup>,  
5 Froukje van der Wal<sup>3</sup>, Jérémie Lucas<sup>1</sup>, Catarina S. Silva<sup>1,4</sup>, Agnès Jourdain<sup>1</sup>, Jose Muino<sup>5</sup>, Max  
6 H. Nanao<sup>6</sup>, Richard Immink<sup>3,7</sup>, Kerstin Kaufmann<sup>2</sup>, François Parcy<sup>1</sup>, Cezary Smaczniak<sup>2,#</sup>,  
7 Chloe Zubieta<sup>1,#</sup>  
8

9 <sup>1</sup> Laboratoire Physiologie Cellulaire et Végétale, Univ. Grenoble Alpes, CNRS, CEA, INRAE, IRIG-DBSCI-  
10 LPCV, 17 avenue des martyrs, F-38054, Grenoble, France.

11 <sup>2</sup> Plant Cell and Molecular Biology, Humboldt-Universität zu Berlin, Institute of Biology, Berlin, Germany.

12 <sup>3</sup> Bioscience, Wageningen Plant Research, Wageningen University and Research, 6708 PB, Wageningen, The  
13 Netherlands.

14 <sup>4</sup> European Molecular Biology Laboratory, Grenoble, France

15 <sup>5</sup> Systems Biology of Gene Regulation, Humboldt-Universität zu Berlin, Institute of Biology, Berlin, Germany.

16 <sup>6</sup> European Synchrotron Radiation Facility, Structural Biology Group, Grenoble, France

17 <sup>7</sup> Laboratory of Molecular Biology, Wageningen University and Research, 6708 PB, Wageningen, The  
18 Netherlands.

19 \*first

20 #correspondence

## 23 **Abstract**

24 The MADS transcription factors (TF) are an ancient protein family with a high degree of  
25 sequence identity that bind almost identical DNA sequences across all eukaryotic kingdoms of  
26 life, yet fulfill dramatically different physiological roles. In plants, the family is divided into  
27 two main lineages, type I and II, based on sequence conservation of the DNA-binding MADS-  
28 box domain (M domain) with yeast and animal M domains. Here, we demonstrate that DNA  
29 binding in both lineages absolutely requires a short amino acid sequence C-terminal to the M  
30 domain called the Intervening domain (I domain) in type II MADS. Structural elucidation of  
31 the MI domains from the floral regulator, SEPALLATA3 (SEP3), shows a highly conserved  
32 MADS-box fold with the I domain forming an alpha helix and acting to stabilize the M domain.  
33 Based on secondary structure prediction, sequences fulfilling the same function as the SEP3 I  
34 domain can be found in both lineages of plant MADS TFs, suggesting the I domain is a  
35 conserved and required part of the DNA-binding domain. Using the floral organ identity MADS  
36 TFs, SEP3, APETALA1 (AP1) and AGAMOUS (AG), domain swapping demonstrate that the  
37 I domain alters DNA-binding specificity based on seq-DAP-seq experiments. Yeast 2-hybrid  
38 experiments further revealed the role of the I domain in dimerization specificity. Surprisingly,  
39 introducing AG carrying the I domain of AP1 in the Arabidopsis *ap1* mutant, resulted in a high  
40 degree of complementation and restoration of first and second whorl organs. Taken together,  
41 these data demonstrate that the I domain acts both as an integral part of the DNA-binding  
42 domain and strongly contributes to the functional identity of the MADS TF.  
43

## 44 **Introduction**

45 The MADS-box genes, named after founding members *MINICHROMOSOME*  
46 *MAINTENANCE1* (*MCMI*, *Saccharomyces cerevisiae*), *AGAMOUS* (*Arabidopsis thaliana*),  
47 *DEFICIENS* (*Antirrhinum majus*), and *SERUM RESPONSE FACTOR* (*SRF*, *Homo sapiens*),

48 is an ancient gene family present before the ancestral split of animals, plants and fungi<sup>1-4</sup>. Prior  
49 to the divergence of eukaryotes into different kingdoms of life, the MADS gene family  
50 underwent a duplication event giving rise to two main lineages, the SRF-like and MEF2-like  
51 lineages, which correspond to the type I and II MADS genes in plants, respectively<sup>6,7</sup>. While  
52 these two MADS lineages both encode a highly conserved ~60 amino acid MADS-box DNA-  
53 binding domain (DBD) that recognizes a CArG box motif (CC-“Adenine rich”-GG), DNA-  
54 binding preferences are slightly altered due to amino acid changes in the MADS-box domain  
55 specific to each lineage<sup>8-11</sup>. In addition to changes in amino acids important for direct base  
56 readout, the region C-terminally adjacent to the MADS-box domain varies based on sequence  
57 alignments and available structural data for mammalian and fungal SRF-like and MEF2-like  
58 MADS TFs. These carboxyl terminal sequences have been shown to be important for  
59 dimerization and DNA binding although they do not directly contact the DNA<sup>4,8,12</sup>. While the  
60 MADS genes are ubiquitous in extant eukaryotes, they have undergone a significant expansion  
61 in plants, with angiosperms possessing tens of type I SRF-like and type II MEF2-like MADS  
62 genes that fulfill diverse physiological roles.

63 The plant type I MADS genes generally consist of one or two exons and encode  
64 transcription factors (TFs) comprised of the MADS-box DBD and a variable C-terminal  
65 domain. The type I genes are further subdivided into three subfamilies,  $M\alpha$ ,  $M\beta$  and  $M\gamma$ , with  
66 preferential interactions between subfamilies forming heterodimeric complexes<sup>13,14</sup>. While  
67 generally expressed at very low levels in a tissue specific manner, the type I genes have been  
68 shown to be important in plant reproduction and speciation, with crucial roles in female  
69 gametophyte, embryo, and endosperm development<sup>15,16</sup>. In contrast to the simple one or two  
70 exon composition and protein structure of the type I MADS, the type II genes consist of 5-8  
71 exons and encode TFs with a modular four-domain structure, called “MIKC”<sup>17-19</sup>. The MIKC  
72 domains refer to M, for MADS DBD, I for the dimerization specifying Intervening domain, K  
73 for the coiled-coil keratin-like domain involved in dimer and tetramer formation and C for the  
74 variable C-terminal domain important for transactivation and higher order complex formation.  
75 The type II MADS are further subdivided into the MIKC\* and MIKC<sup>C</sup> subfamilies based on  
76 the structure of the I domain, with dimerization mainly occurring within the same subfamily,  
77 but not between subfamilies<sup>20-22</sup>. While all MADS TFs are believed to form dimeric complexes  
78 in order to bind DNA, the type II MADS TFs are able to tetramerise via the K domain, greatly  
79 expanding the number of possible MADS complexes that can be formed<sup>23-25</sup>. The diversity of  
80 heteromeric complexes the type II MADS form is hypothesized to be directly tied to their  
81 functional diversity<sup>26</sup>. The type II MADS play well established roles in many developmental

82 processes including meristem identity, flowering time, fruit and seed development and floral  
83 organ identity<sup>27</sup>.

84 The MADS TFs involved in floral organ specification are arguably the most well studied  
85 MADS family members and provide an ideal model to examine function *in planta*. Elegant *in*  
86 *vitro* and *in vivo* experiments dating back decades have tried to address the question of how  
87 plant MADS TF achieve their DNA-binding specificity and functional diversity in the context  
88 of flower and floral organ development<sup>28,29</sup>. Four classes of MIKC MADS TFs, class A, B, C  
89 and E are necessary for floral organ identity. The A+E class specify sepals, the A+B+E petals,  
90 A+C stamen and C+E carpels. In Arabidopsis, these correspond to APETALA1 (AP1, A class),  
91 APETALA3 (AP3, B class) and PISTILLATA (PI, B class), AGAMOUS (AG, C class) and  
92 the four SEPALLATAs (SEP1 -4, E class). The generation of chimeric MADS TFs with  
93 swapped M domains from AP1, AP3, PI and AG demonstrated that the MADS domains of these  
94 proteins were interchangeable with respect to their *in vivo* function<sup>29,30</sup>. Even swapping in  
95 portions of human or yeast M domains, which did alter *in vitro* DNA-binding, did not alter the  
96 function of the MADS proteins *in vivo*, suggesting that the physiological function of these  
97 proteins seems to be independent of the DNA-binding domain<sup>30</sup>. Thus, tetramerisation in MIKC  
98 MADS TFs came under scrutiny as a potential determinant of DNA-binding syntax by selecting  
99 for two-site DNA-binding constrained by specific intersite distances<sup>31,32</sup>. More recent studies  
100 of a tetramerisation mutant of SEP3 revealed that while tetramerisation contributed to *in vivo*  
101 function, *in vitro* changes in DNA-binding specificity genome-wide were more limited,  
102 putatively affecting a relatively small number of key gene targets whose regulation depends on  
103 specific spacings between CARG box binding sites<sup>32,33</sup>. Thus, the fundamental question of how  
104 plant MADS TFs are able to recognize different DNA sequences critical for the regulation of  
105 different target genes, with apparently interchangeable DBDs, is still not fully resolved.

106 In order to address this, we performed structural, biochemical, genome-wide binding  
107 and *in vivo* studies focusing on the role of the Intervening domain. We demonstrate that an I-  
108 like domain is present in both type I and type II plant MADS TFs and that this region is required  
109 for DNA-binding, affects DNA-binding specificity and alters dimerization specificity *in vitro*  
110 and in yeast assays. Seq-DAP-seq experiments comparing SEP3-AG and SEP3-AG<sup>IAP1</sup>, a  
111 chimera with the I domain from AG replaced by the I domain of AP1, revealed unique binding  
112 sites for each complex, changes in preferred site spacing and a loss of carpel and fourth whorl-  
113 specific targets for the chimeric protein. Using these same floral organ identity MADS TFs to  
114 probe *in vivo* function of the I domain, different chimeric constructs were introduced into the  
115 *apl* background. Interestingly, replacing the I domain of *AG* with that of *AP1* was sufficient to

116 confer the majority of *API* functions *in planta* including sepal and petal identity in the first and  
117 second whorls. Taken together, these data illustrate the importance and multiple roles of the I  
118 domain in DNA-binding and *in planta* function.

119

## 120 **Results**

### 121 **Structure of the SEPALLATA3 MI domain**

122 The MADS-box and I domain of SEP3 (SEP3<sup>MI</sup>, residues 1-90) was used in structural  
123 studies as this construct has been shown to be dimeric in solution and to bind DNA in a sequence  
124 specific manner<sup>34</sup>. SEP3<sup>MI</sup> crystallized in spacegroup C222<sub>1</sub> with 4 monomers per asymmetric  
125 unit and diffraction to 2.1 Å (**Table 1**). The first 18 amino acids, which are predicted to have  
126 no defined secondary structure, were disordered as were the 17 C-terminal amino acids, and no  
127 electron density was interpretable for these portions of the protein in any of the molecules. Each  
128 monomer adopts the same tertiary structure with an N-terminal alpha helix ( $\alpha$ 1; aa 18-40) and  
129 two antiparallel beta strands ( $\beta$ 1; aa 44-48 and  $\beta$ 2; aa 55-58). These elements make up the core  
130 MADS DBD and are conserved in the MEF2 and SRF-like MADS TFs (**Figure 1A and B**). C-  
131 terminal to the beta strands is a short loop followed by an alpha helix which is contributed by  
132 the I domain ( $\alpha$ 2; aa 63-73). The orientation of the C-terminal alpha helix differs between MEF2  
133 (PDB codes 1EGW, 1C7U, 1TQE, 3KOV) and SRF-like MADS TFs (PDB code 1HBX), with  
134 SEP3<sup>MI</sup> resembling the MEF2 structure. Overall, SEP3<sup>MI</sup> adopts the MADS/MEF2 fold, as  
135 predicted for type II plant MADS TFs.

136 Each SEP3<sup>MI</sup> monomer dimerizes via extensive contacts between the pairs of alpha  
137 helices and beta strands from each partner, with dimerization required for DNA binding. In the  
138 structure, all dimers were formed by crystallographic symmetry, with dimerization burying over  
139 25% of the total surface area of the molecule (**Figure 1**)<sup>35</sup>. The dimer interface includes  
140 hydrophobic interactions between residues in the N-terminal DNA-binding alpha helices,  
141 Leu28 and Leu35, and pairs of salt bridges between Glu34 and Arg24 (**Figure 1D**). The  
142 formation of a 4-stranded antiparallel beta sheet further stabilizes the quaternary structure of  
143 SEP3 with interactions bridging the N-terminal DNA binding helices and the C-terminal I  
144 domain helices. The I domain helices sandwich the beta sheet and lie perpendicular to the DNA-  
145 binding helices of the MADS-box domain. The I domain is anchored to the beta sheet via  
146 hydrogen bonding interactions between Glu56 and Tyr70 and pi-cation interactions between  
147 Phe48 and Arg69 of the partner monomers. Each I domain helix also interacts with

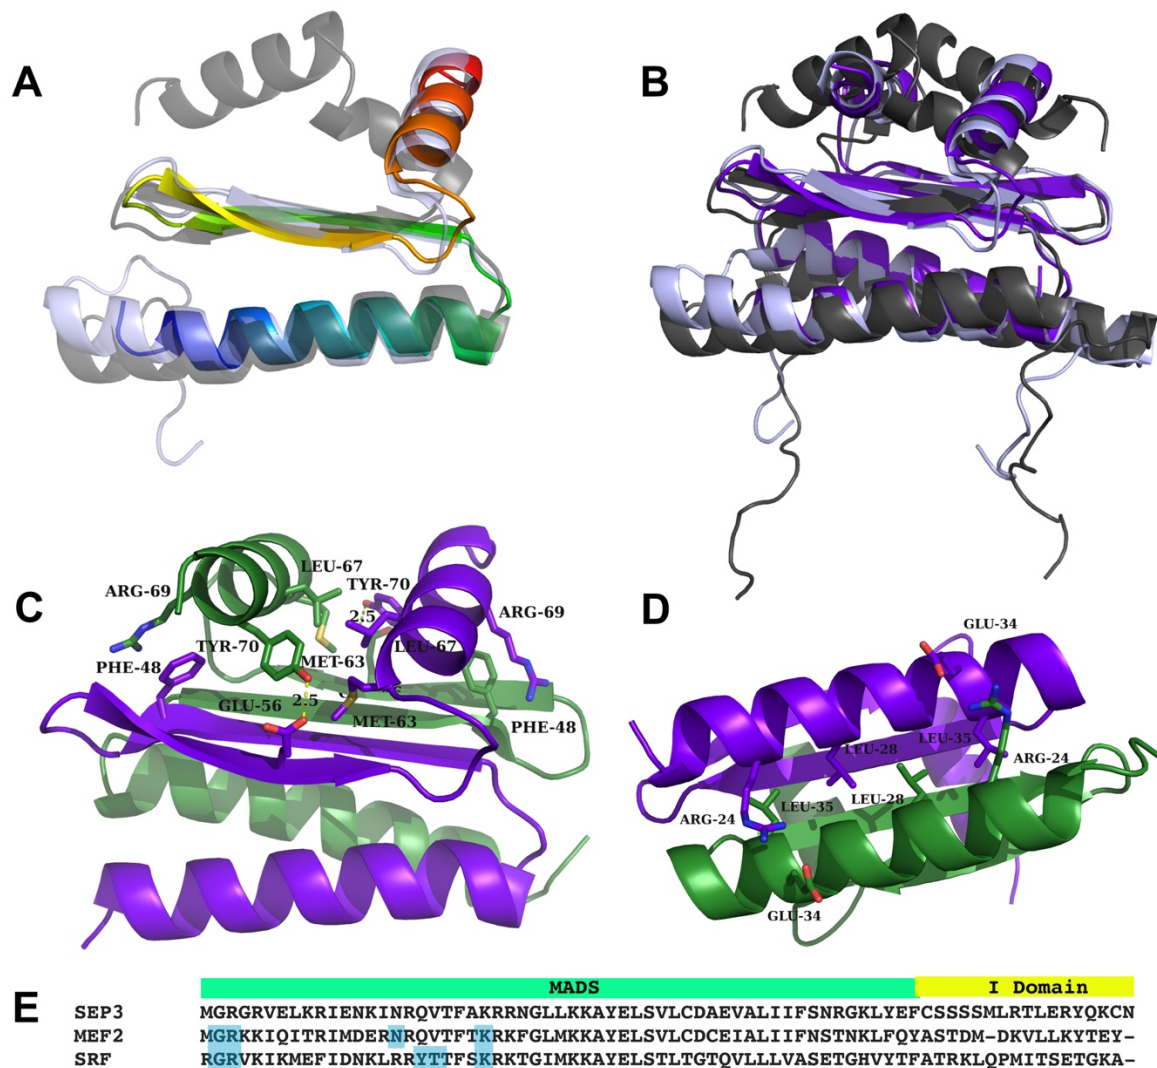

148  
149 **Figure 1. Structure and sequence of the SEP3 MI domain and corresponding SRF and MEF2 regions.** (A) Overlay of  
150 SEP3 dimer (rainbow) and SRF (1HBX) dimer (gray). The I region is alpha helical for both structures, however the contacts  
151 with the M domain differ. (B) Overlay of SEP3 (dark purple) and MEF2A (3KOV, light purple) and SRF (gray) demonstrating  
152 the different conformations of the I region in the type II (MEF2-like) and I (SRF-like) MADS TFs. (C) SEP3 dimer with one  
153 monomer in purple and one in green. Amino acids important for interactions between I domains and between M and I domains  
154 are labelled and drawn as sticks. Hydrogen bonds are shown as dashed yellow lines. (D) View of the I domain with  
155 intermolecular interactions from the N-terminal alpha helices shown. (E) Partial sequence alignment of SEP3 (accession  
156 NP564214.2), MEF2 (accession AAB25838.1) and SRF (accession P11831) corresponding to the region in the crystal structure.  
157 Residues directly contacting the DNA for MEF2 and SRF are highlighted in blue.

158 its dimer partner helix via hydrophobic interactions mediated by Leu67, Tyr70 and Met63  
159 (**Figure 1C**). These residues are highly conserved in all MIKC MADS TFs from Arabidopsis,  
160 suggesting that the interactions are also conserved and likely important for structural stability  
161 of plant MADS TFs. Mutations R69L (present in APETALA3), R69P (present in  
162 FLOWERING LOCUS M-delta) and Y70E (present in FLM-delta) destabilized SEP3<sup>MI</sup> based  
163 on thermal shift assays, as predicted from the structural data (**Supplementary Figure 1**).

164 SEP3<sup>MI</sup> was crystallised without DNA, however, multiple DNA-bound structures of the  
165 closely related MEF2 protein are available for comparison. Structural alignment of SEP3<sup>MI</sup> with  
166 the corresponding MEF2 structure reveals a rmsd of 0.942 Å<sup>2</sup>, underscoring the conservation

167 in the MADS/MEF2 domains with the MADS/I domains of SEP3<sup>M1</sup> (**Figure 1A, B**). The  
168 residues directly contacting the DNA are contributed from the flexible N-terminus and the N-  
169 terminal helix of the MADS-box domain, with no direct contacts from the MEF2/I domain  
170 (**Figure 1E**). These DNA-binding residues are highly conserved in SEP3 even though MEF2  
171 recognizes a YTA(A/T)<sub>4</sub>TAR sequence (Y=pyrimidine, R=purine), whereas SEP3 recognizes  
172 a classic CA<sub>6</sub>G box motif (CC(A/T)<sub>6</sub>GG). The differences in DNA-binding specificity of the  
173 MEF2-like MADS TFs coupled with the high conservation of sequence and structure of the  
174 MADS-box domain itself, suggest allosteric contributions from the MEF2/I domain may play  
175 a role in DNA binding. Indeed, examining the DNA-binding of the I domain mutants R69L,  
176 R69P and Y70E demonstrated that these single point mutations were sufficient to abrogate the  
177 DNA binding activity of the full-length SEP3 based on electrophoretic mobility shift assays  
178 (EMSAs) (**Supplementary Figure 1**).

179

#### 180 **Type I and II MADS possess I-like domain sequences required for DNA-binding**

181 Structural and mutagenesis data suggest that the MEF2/I domain is critical for stability  
182 and DNA-binding of type II MADS TFs. The type I plant MADS TFs do not possess an I or  
183 MEF2-domain and are more closely related to the SRF-type MADS TFs. However, the structure  
184 of SRF (PDB 1HBX) reveals a similar alpha helical region C-terminal to the MADS-box  
185 domain, albeit with a different orientation of helices from the MEF2/I domain (**Figure 1A**).  
186 Protein sequence alignment of the 106 MADS TFs from Arabidopsis reveal that 104 of the 106  
187 sequences possess ~15 amino acids C-terminal to the MADS domain that are structurally  
188 conserved and predicted to form alpha helices with similar physicochemical properties (**Figure**  
189 **2A**). In particular, positions including Arg69 and Tyr70 in SEP3 that are important for I domain  
190 anchoring to the M domain are conserved in both type I and type II MADS, while a high degree  
191 of sequence variation in the non-alpha helical region is observed (**Figure 2A and**  
192 **Supplementary Figure 2**). This suggests that these ~15 amino acids in type I MADS TFs may  
193 act as an I-like alpha helical domain and stabilize the structure of the DBD, influence DNA-  
194 binding specificity or both.

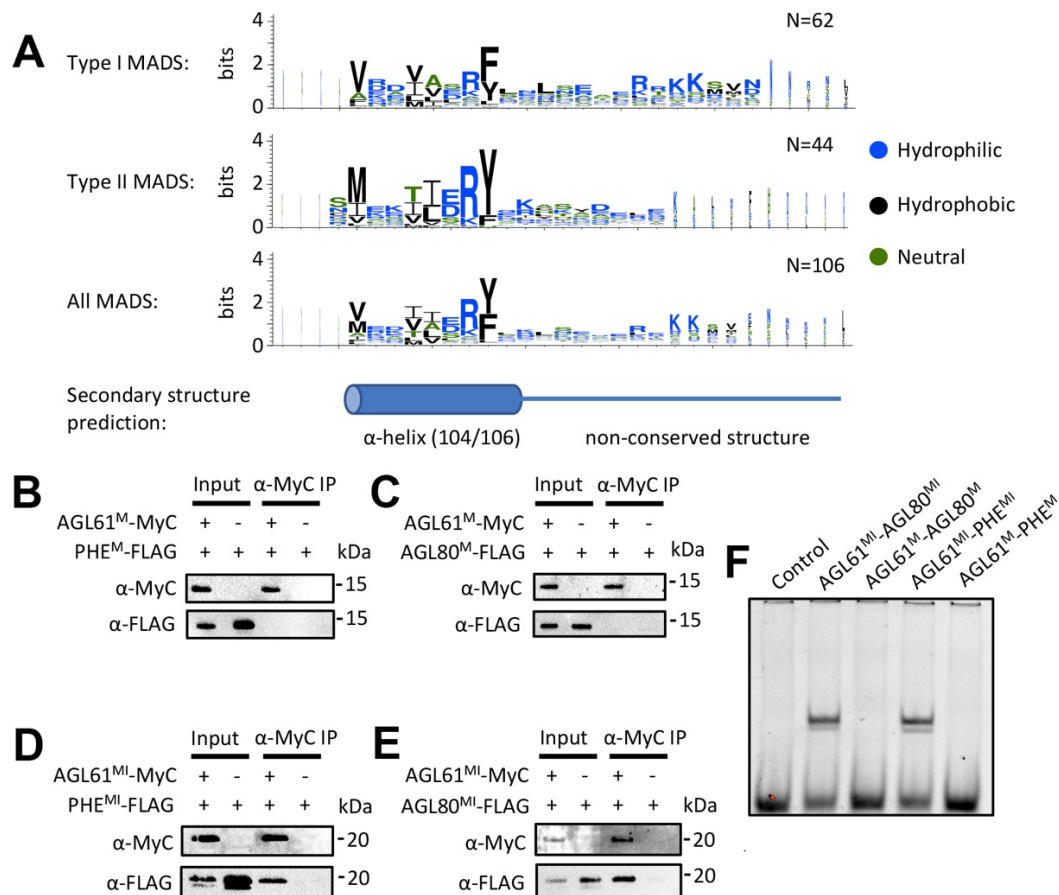

195  
 196  
 197  
 198  
 199  
 200  
 201  
 202  
 203  
 204  
 205  
 206

**Figure 2. Type I MADS possesses I domain like region which is required for both dimerization and DNA binding.** (A) Amino acid enrichment of the I region (~30 amino acids C-terminal to the M domain) of type I, type II and all MADS TFs, logos generated with WebLogo<sup>36</sup>. The overall height of the stack in each position indicates the sequence information content at that position, while the height of the amino acid symbols within the stack indicates the relative frequency at each position. The MADS TF sequences are taken from The Arabidopsis Information Resource ([www.arabidopsis.org](http://www.arabidopsis.org)). (B-C) Pull-down assay showing that M domain of AGL61 (AGL61<sup>MI</sup>) does not interact with the M domain of PHE (PHE<sup>MI</sup>) or AGL80 (AGL80<sup>MI</sup>). (D-E) Pull-down assay showing that the M domain plus the I like region of AGL61 (AGL61<sup>MI</sup>) interacts with the MI region of PHE (PHE<sup>MI</sup>) and AGL80 (AGL80<sup>MI</sup>). (F) EMSA assay showing that heterodimers AGL61<sup>MI</sup>-AGL80<sup>MI</sup> and AGL61<sup>MI</sup>-PHE<sup>MI</sup> shift a DNA sequence containing a canonical CARG-box binding site from the *SEP3* promoter, while their corresponding constructs without the I region do not exhibit any binding.

207 To further determine the role of the alpha helical region adjacent to the M domain in  
 208 both type I and II MADS (called for simplicity the I region hereafter), we performed pull down  
 209 experiments and EMSAs for representative MADS TFs from Arabidopsis. We chose  
 210 AGAMOUS-LIKE 61 (AGL61) from subclass M $\alpha$  and AGAMOUS-LIKE 80 (AGL80) and  
 211 PHERES1 (PHE1) from subclass M $\gamma$  for type I MADS TFs, as interaction patterns of these  
 212 have been previously studied<sup>37,38</sup>. Pull-down experiments revealed that the M+I region of  
 213 AGL61 (AGL61<sup>MI</sup>) interacts with the M+I region of AGL80 (AGL80<sup>MI</sup>) or PHE1 (PHE1<sup>MI</sup>),  
 214 while the M domains alone are not sufficient for interaction (Figure 2B-E), suggesting that the  
 215 I region in type I MADS TFs is required for stable dimerization. Consistent with this, EMSAs

216 show that while heterodimers of AGL61<sup>MI</sup>-AGL80<sup>MI</sup> and AGL61<sup>MI</sup>-PHE1<sup>MI</sup> bind to a canonical  
 217 CArG box motif, the M domains alone exhibit no DNA binding (**Figure 2F**).

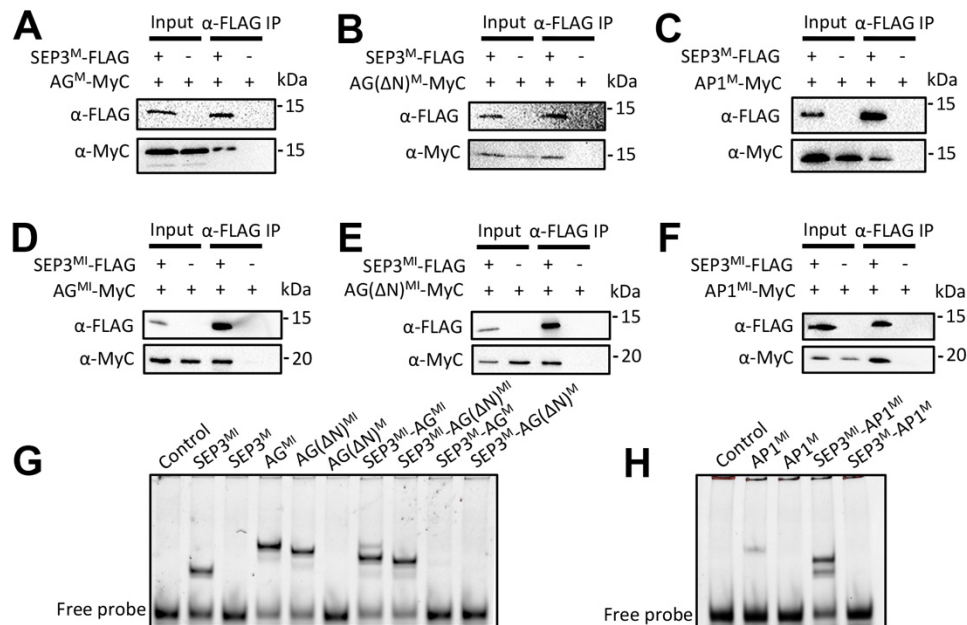

218  
 219 **Figure 3. Type II MADS TFs require the I domain for DNA binding but not dimerization.** (A-C) Pull-down assay showing  
 220 that the M domain of SEP3 (SEP3<sup>M</sup>) interacts with the M domains of AG (AG<sup>M</sup>), AG with the first 16 N-terminal amino acids  
 221 deleted (AG(ΔN)<sup>M</sup>) and AP1 (AP1<sup>M</sup>), respectively. (D-F) Pull-down assay showing that the MI domain of SEP3 (SEP3<sup>MI</sup>)  
 222 interacts with the MI domain of AG<sup>MI</sup>, AG(ΔN)<sup>MI</sup> and AP1<sup>MI</sup>, respectively. (G and H) EMSA assay showing that homodimers  
 223 from SEP3<sup>MI</sup>, AG<sup>MI</sup>, AG(ΔN)<sup>MI</sup> and AP1<sup>MI</sup>, and heterodimers SEP3<sup>MI</sup>-AG<sup>MI</sup>, SEP3<sup>MI</sup>-AG(ΔN)<sup>MI</sup> and SEP3<sup>MI</sup>-AP1<sup>MI</sup> shift a  
 224 DNA sequence containing a canonical CArG-box binding site (as per Figure 2), while their corresponding constructs without  
 225 the I domain can not, suggesting that the I domain in type II MADS TFs is required for DNA binding.

226 For the type II MADS TFs, we generated M domain and MI domain constructs for  
 227 SEP3, AP1 and AG. In Arabidopsis, SEP3-AP1 containing MADS TF complexes define first  
 228 and second whorl flower organs (sepal and petals) whereas SEP3-AG containing complexes  
 229 are required for third and fourth whorl (stamen and carpel) flower organ identity. We focused  
 230 on these MADS TFs as their heterocomplex formation, DNA-binding specificity and *in vivo*  
 231 activity are well understood<sup>11,14,23,39-43</sup>. As expected, the MI domain of SEP3 interacts with that  
 232 of AP1 and AG (**Figure 3D-F**). However, in contrast to the type I MADS, the M domain of  
 233 SEP3 is able to pull down the M domains of AP1 and AG (**Figure 3A and C**). As AG possesses  
 234 an N-terminal 16 amino acid extension, constructs with and without these amino acids were  
 235 tested. Both constructs were able to interact with the M domain of SEP3 (**Figure 3A and B**).  
 236 Thus, unlike the type I MADS TFs tested, the M domain alone of the type II MADS TFs tested  
 237 was sufficient for protein-protein interaction. However, the M domains alone of SEP3-AP1 and  
 238 SEP3-AG were unable to bind a canonical CArG DNA motif in EMSA experiments (**Figure**  
 239 **3G and H**), suggesting that the M domain of type II without the I domain is not sufficient to  
 240 form a stable dimer for DNA binding. In contrast, homo and heterodimers of the MI domains



241 of SEP3, SEP3-AP1, AP1, AG and SEP3-AG were all able to bind DNA under our  
242 experimental conditions (**Figure 3G and H**). Taken together, these data suggest that the I  
243 domain, while possessing no direct interactions with DNA, is essential for DNA-binding for  
244 both type I and type II MADS TFs, likely by stabilizing the MADS TF dimer.

245

### 246 **Impact of the I domain on DNA-binding specificity and intersite spacing**

247 To further explore the role of the I domain in DNA-binding specificity, we focused on  
248 the floral organ identity-specifying MADS TFs, SEP3, AP1, AG and a chimeric version of AG,  
249 in which the AG I-domain was replaced with the AP1 I-domain (AG<sup>IAP1</sup>). Using sequential  
250 DNA-affinity purification followed by sequencing (seq-DAP-seq ref), we determined the  
251 DNA-binding of the heteromeric complexes of SEP3-AG<sup>32</sup> and SEP3-AG<sup>IAP1</sup> (this study).  
252 Unfortunately, the SEP3-AP1 heteromeric complex under the same experimental conditions  
253 did not yield data of sufficient quality for analysis. However, SEP3-AG and SEP3-AG<sup>IAP1</sup>  
254 strongly bound DNA and each produced highly similar replicates for data analysis  
255 (**Supplementary Fig. 3**). We used a highly stringent peak calling for each replicate and peaks  
256 were kept only when present in all replicates. This yielded 6,347 peaks for SEP3-AG and 3,552  
257 peaks for SEP3-AG<sup>IAP1</sup>. These peak lists were merged and the binding intensities for the two  
258 complexes were compared for all resulting peaks. This profiling indicates that while most peaks  
259 have a similar binding intensity, several hundred exhibited at least a two-fold difference in  
260 binding intensity between SEP3-AG and SEP3-AG<sup>IAP1</sup> (**Figure 4A-B**). The same profiling  
261 between replicas for a given dataset demonstrated no such variability in binding intensity  
262 (**Supplementary Figure 3**).

263 The top 15% sequences (1,073 sequences for each complex) displaying the most  
264 extreme binding difference were used to search for specific DNA patterns that potentially code  
265 for SEP3-AG and SEP3-AG<sup>IAP1</sup> differential response. The TF binding sites were modeled using  
266 position weight matrices, transcription factor flexible models and k-mer set memory (KSM)  
267 analysis. Due to the highly similar binding modes of the MADS family TFs, only KSM was  
268 sensitive enough to differentiate the MADS heterocomplexes (**Figure 4C and D**)<sup>44</sup>. For the  
269 KSM, pipeline, KMAC and KSM tools from the GEM package <sup>45</sup> were used to search for  
270 clusters of short (4-20 bp) overlapping sequences (with allowances and penalties for gaps and  
271 mismatches) that are over-represented in the 600 sequences bound best by either SEP3-AG or  
272 SEP3-AG<sup>IAP1</sup>. This analysis yielded 55 clusters for SEP3-AG and 22 clusters for SEP3-AG<sup>IAP1</sup>  
273 and served as kmer-based models for prediction analysis. With AUC of 0.79 for SEP3-AG and  
274 0.84 for SEP3-AG<sup>IAP1</sup>, the kmer-based models were highly predictive. Importantly, each kmer-

275 based model did not perform well (AUC  $\sim$ 0.7) in predicting bound regions from the other  
276 heterocomplex (**Figure 4D**). This suggests that specific sequence patterns code for differential  
277 binding between the two heterocomplexes.

278 Previously, using seq-DAP-seq, we showed that SEP3-AG demonstrates preferential  
279 intersite spacing of  $\sim$ 47 and  $\sim$ 57 bp between two CArG boxes due to its cooperative binding, a  
280 contributing factor for DNA-binding specificity of MADS TF complexes<sup>32</sup>. Using specific  
281 bound regions of SEP3-AG<sup>IAP1</sup> when compared with SEP3-AG, we found that SEP3-AG<sup>IAP1</sup>  
282 gained new preferential intersite spacings of 25 and 34 bp and lost the SEP3-AG preferential  
283 intersite spacings (**Figure 4E**). This further suggests that the I domain plays a role in DNA-  
284 binding specificity by affecting the conformation of the tetramer and selecting for specific  
285 intersite distances.

286 In order to determine whether these observed *in vitro* differences in binding were  
287 potentially relevant *in vivo*, we examined published ChIP-seq datasets. Previous studies have  
288 shown that the *in vitro* binding of SEP3-AG relative to SEP3-AP1 in SELEX-seq correlates  
289 with the *in vivo* binding intensity of AG relative to AP1 in ChIP-seq for the 1500 most enriched  
290 SEP3 ChIP-seq peaks (**Figure 4F**)<sup>44</sup>. This result suggested that specific sequence patterns  
291 detected *in vitro* were able to at least weakly discriminate sequences either more likely to be  
292 bound by SEP3-AG or by SEP3-AP1 in the Arabidopsis genome. Applying the same analysis  
293 to our seq-DAP-seq data, we found a similar weak positive correlation between the SEP3-AG  
294 binding affinity relative to that of SEP3-AG<sup>IAP1</sup> and the corresponding ChIP-seq derived *in vivo*  
295 binding, suggesting that SEP3-AG<sup>IAP1</sup> behaves more similarly to SEP3-AP1 than to SEP3-AG  
296 (**Figure 4F**). Although modest, this correlation is supported by the observation that the genes  
297 corresponding to the 250 peaks most differentially bound by SEP3-AG relative to SEP3-AG<sup>IAP1</sup>  
298 exhibited a 7.6-fold enrichment for genes involved in “carpel development” GO term (FDR =  
299  $4.2 \times 10^{-3}$ ). However, no clear GO term enrichment was detected for genes corresponding to  
300 the 250 regions best bound by SEP3-AG<sup>IAP1</sup> relative to SEP3-AG. This may be due to the  
301 relatively small number of genes corresponding to GO terms for “petal development” (4 genes)  
302 and “sepal development” (13 genes), suggesting an incomplete list of genes for these GO terms.  
303 Taken together, the binding differences between the SEP3-AG<sup>IAP1</sup> and SEP3-AG complex  
304 suggest that the AG<sup>IAP1</sup> protein has lost some AG identity and gained AP1-like identity.

305

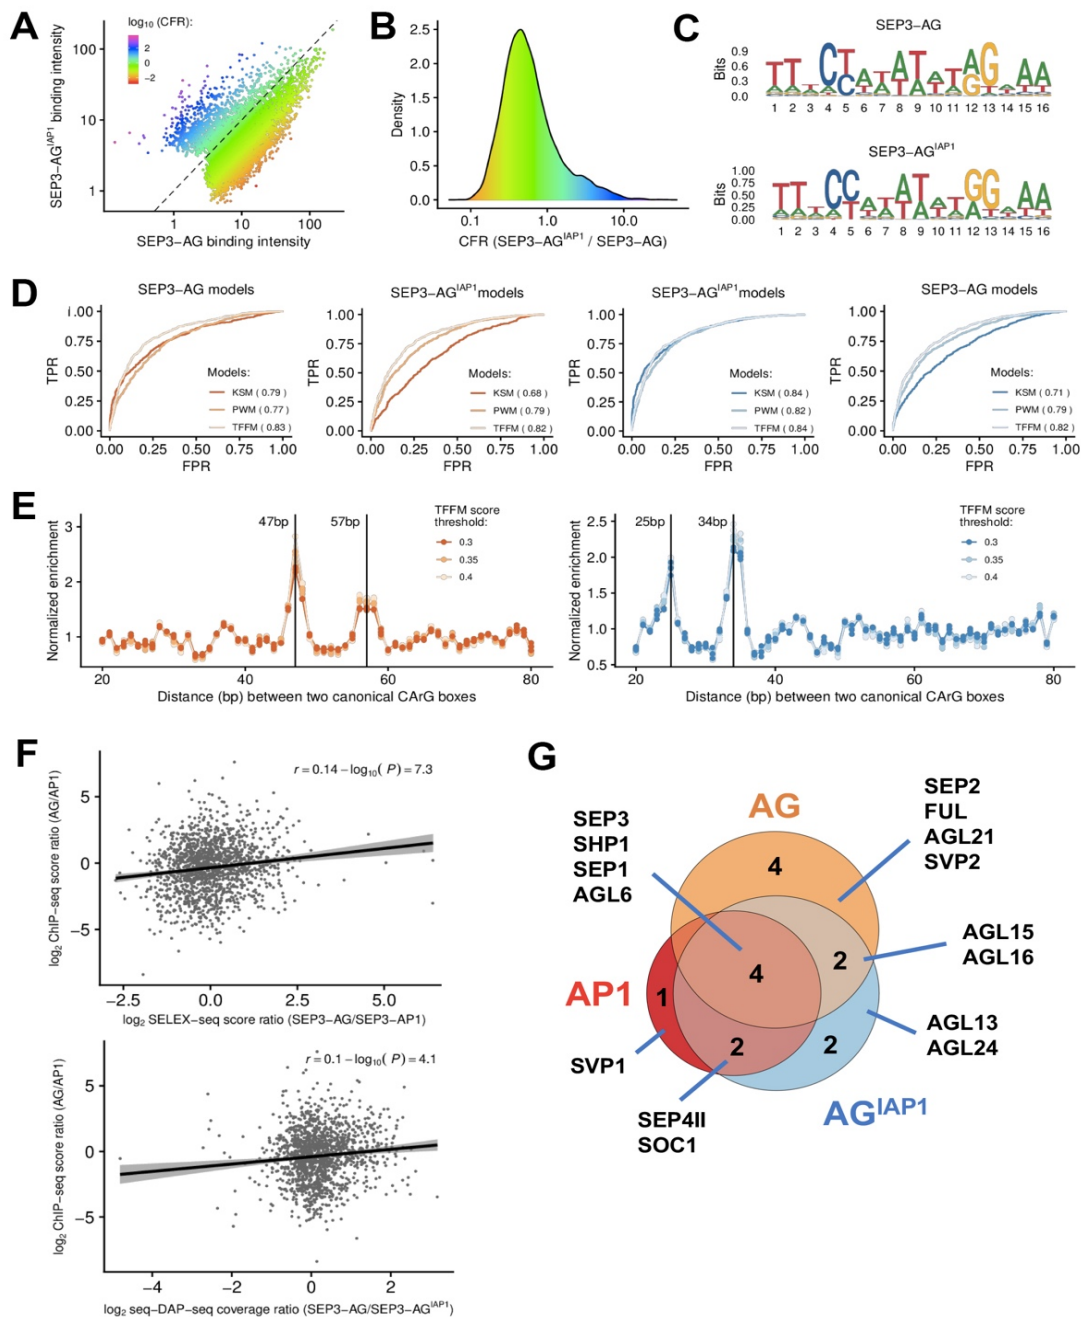

**Figure 4. DNA-binding and protein interactions patterns.** (A) Comparison of SEP3-AG and SEP3-AG<sup>IAP1</sup> seq-DAP-seq binding intensity (log<sub>10</sub> of reads per kb per million of reads mapped in bound regions) and color-coded by purple-blue (SEP3-AG<sup>IAP1</sup>-specific) to orange-red (SEP3-AG-specific) according to log<sub>10</sub> of SEP3-AG<sup>IAP1</sup>/SEP3-AG. (B) Density plot showing data as per A. (C) Logos derived from PWM-based models obtained for SEP3-AG and SEP3-AG<sup>IAP1</sup>. (D) Predictive power of TFBS models. Models are built using 600 sequences best bound by each of the two heterocomplexes and are searched against 1,073 SEP3-AG (orange) and 1,073 SEP3-AG<sup>IAP1</sup> (blue) specific regions, defined as the top 15% of sequences that are most strongly bound by one complex relative to the other. Matrix-based models (PWM and TFFM) are not able to differentiate SEP3-AG and SEP3-AG<sup>IAP1</sup> binding whereas k-mer-based analysis is able to better predict binding for the respective datasets. (E) SEP3-AG favors intersite spacings of 47 and 57 bp based on SEP3-AG specific regions. SEP3-AG<sup>IAP1</sup> favors intersite spacings of 25 and 34 bp based on SEP3-AG<sup>IAP1</sup> specific regions. (F) Top, published SELEX-seq for SEP3-AP1 and SEP3-AG<sup>5</sup> comparing the normalized score ratios (SEP3-AG/SEP3-AP1) for SELEX-seq and score ratios (AG/AP1) ChIP-seq at 1,500 SEP3 best bound loci in ChIP-seq show a positive correlation, suggesting that SEP3-AP1 and SEP3-AG bind different sequences *in vivo* and that *in vitro* binding is able to differentiate bound sequences that are more SEP3-AP1-like versus SEP3-AG-like. Bottom, SEP3-AG and SEP3-AG<sup>IAP1</sup> seq-DAP-seq coverage as per SELEX-seq scores. A positive correlation is observed suggesting that, *in vitro*, the swap of AP1 I domain in AG is able to recover some of the binding specificity of SEP3-AP1. (G) Yeast two-hybrid assays using AG, AP1 and AG<sup>IAP1</sup> as bait against MIKCC MADS TFs in Arabidopsis. Data shows that AG<sup>IAP1</sup> loses AG interactors and gains AP1 interactors.

### 307 **Impact of the I domain on protein interaction specificity**

308         Next, we sought to understand to what extent the I domain could confer protein-protein  
309 interaction specificity as it plays an important role in dimerization and dimer stability<sup>28</sup>. AP1  
310 and AG share SEP3 as a binding partner in the molecular model predicting flower organ  
311 specification, but do exhibit differential heterodimerisation capabilities with other MIKC<sup>c</sup>  
312 MADS TFs<sup>14,23</sup>. In order to probe the function of the I domain in dimerization specificity, a  
313 matrix-based yeast two-hybrid screen for AP1, AG and AG<sup>IAP1</sup> against all Arabidopsis type II  
314 MIKC<sup>c</sup> MADS TFs was performed. The targets were cloned into both bait and prey vectors and  
315 only interactors for both replica and in all three selection media were scored as positive  
316 interactions (**Supplementary Figure 4**). This may underestimate the true number of binding  
317 partners, however, it reduces the number of false positives. Using this strict cut-off for protein-  
318 protein interaction events, AP1 interacted with seven different partners, of which three were  
319 specific for AP1 and four were in common with AG, including the SEP clade members SEP1  
320 and SEP3. AG interacted with ten partners of which six were exclusive with respect to AP1  
321 interacting partners. AG<sup>IAP1</sup> interacted with ten partners, including two out of the three AP1-  
322 specific interactions and lost four AG-specific partners (**Figure 4G**). Interestingly, both SOC1  
323 and AGL24, known AP1 binding partners<sup>14</sup> interacted with the AG<sup>IAP1</sup> chimera but not with  
324 AG. These data indicate that the I domain of AP1 contributes to heterodimerization specificity  
325 of the chimera.

326

### 327 **In planta function of the I domain**

328         *Ap1* mutants (strong *ap1-7* and intermediate *ap1-11*) exhibit a non-ambiguous flower  
329 phenotype including the homeotic conversion of the first whorl sepals into bract-like organs, as  
330 characterized by their leaf-like epidermal morphology and the formation of buds in their axils  
331 and the absence of second whorl organs (**Supplementary Figure 5**)<sup>46,47</sup>. To examine the role  
332 of the I domain in *in vivo* MADS function, complementation of the *ap1* loss-of-function mutants  
333 with different AG/AP1 chimeric constructs was examined. Primary transformants expressing a  
334 battery of chimeric domain swap constructs, *AG<sup>MIKAP1</sup>*, *AG<sup>MIAP1</sup>*, *AG<sup>MAP1</sup>*, *AG<sup>IAP1</sup>*, *AG<sup>KCAP1</sup>* and  
335 *AP1<sup>IAG</sup>*, under the control of the *API* promoter, revealed a spectrum of complementation for the  
336 first and second whorls in the intermediate *ap1-11* mutant background (**Figure 5**).

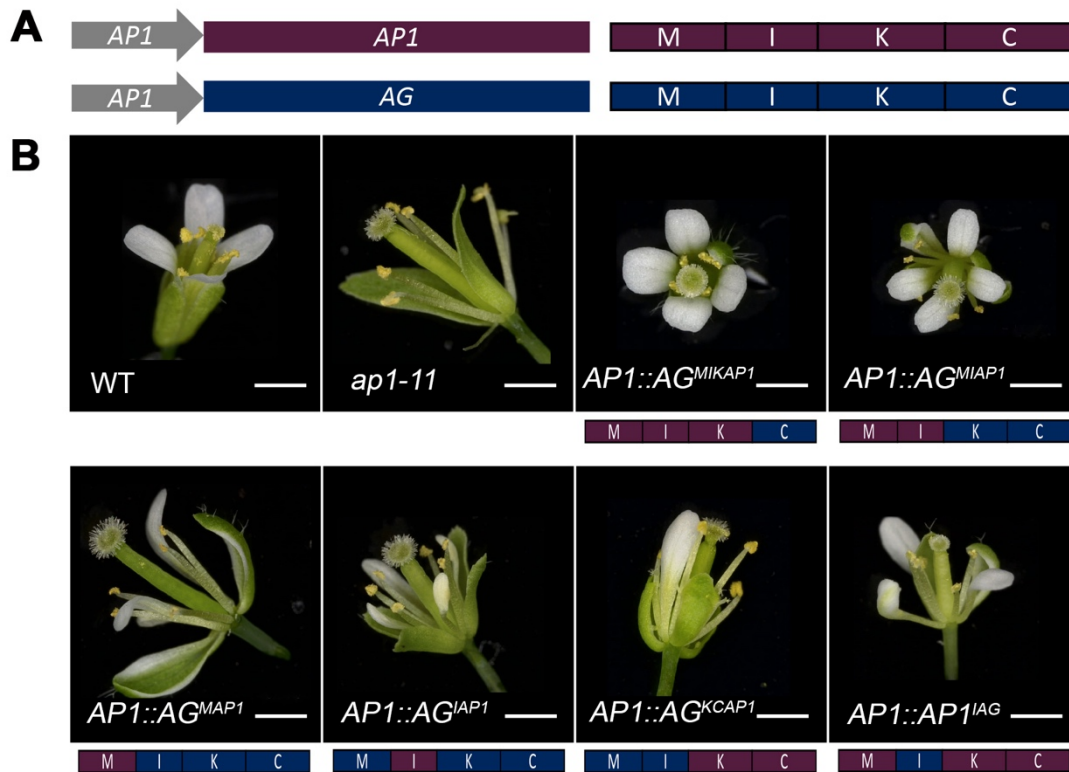

337  
338  
339  
340  
341  
342

**Figure 5. Primary transformants in the *ap1* mutant background exhibit a spectrum of complementation. (A)** Schematic of the constructs and proteins produced with AP1 protein in purple and AG in dark blue. Domains are labeled MIKC. **(B)** Flower phenotypes of T1 transformants ( $n \geq 10$ ). All transformants were in the *ap1-11* background. Phenotypes for WT and *ap1-11* are shown. The domains corresponding to AP1 and AG are colored as per (A) and shown schematically below each panel.

343 *AG<sup>MAP1</sup>* expressing plants were poorly complemented with a reduced number of first  
344 and second whorl organs and only partial organ identity recovery with petaloid and sepaloid  
345 organs in 43% of the plants. *AG<sup>KCAP1</sup>* also complemented poorly, with most of the plants  
346 showing carpeloid sepals and with only partial recovery of 1 to 3 sepals in 60% of the plants.  
347 In contrast, almost complete complementation was present in plants expressing *AG<sup>MIAP1</sup>*, with  
348 92% of the transformants showing 4 sepals or petaloid sepals in the first whorl and 2 to 4 petals  
349 in the second whorl. This was similar to plants expressing *AG<sup>MIKAP1</sup>*, in which first and second  
350 whorl organ identity was restored for 69% of the plants with occasional reduced number of  
351 organs in the second whorl and lateral flower formation. *AP1* plants with the I domain of AG  
352 (*AP1<sup>IAG</sup>*), showed a similar phenotype as *AG<sup>MAP1</sup>*. Strikingly, *AG<sup>IAP1</sup>* expressing plants exhibited  
353 4 sepaloid organs and 3-4 petals or petaloid organs in over 40% of the plants, suggesting that  
354 the I domain acts as the smallest unit conferring the most AP1 function to the *AG<sup>IAP1</sup>* chimera  
355 (**Supplementary Table 2**).

356 To confirm the phenotype of the *AG<sup>IAP1</sup>* expressing plants, three independent  
357 homozygous lines were generated and examined for *AP1*, *AG* and *AG<sup>IAP1</sup>* under the *AP1*

358 promoter in the strong *ap1-7* mutant background (**Figure 6 and Supplementary Figures 6-8**).  
359 *AG<sup>LAP1</sup>* *ap1-7* lines produced flowers very similar to WT (**Figure 6**).

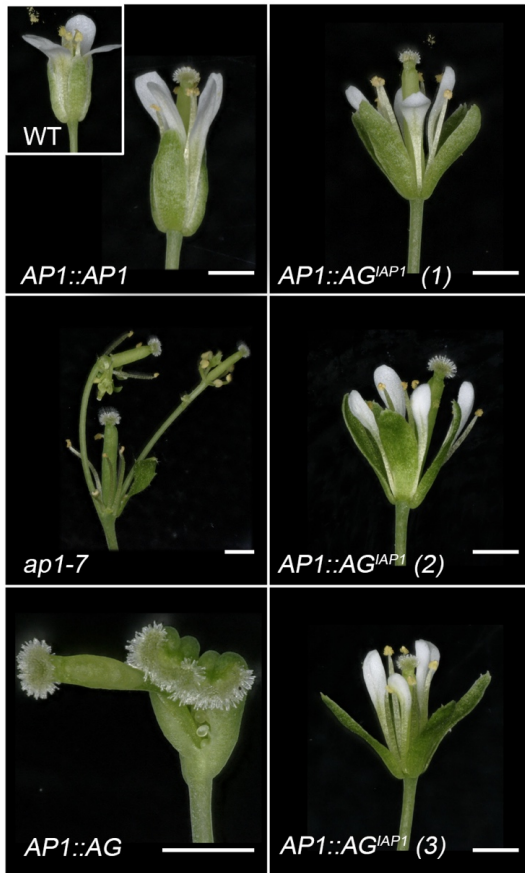

**Figure 6. *AP1:AG<sup>LAP1</sup>* expression largely complements the *ap1-7* flower phenotype.** *ap1-7* lines expressing either *AP1* (*AP1::AP1*), *AG* (*AP1::AG*) or *AG<sup>LAP1</sup>* (*AP1::AG<sup>LAP1</sup>*) under the control of the *AP1* promoter were grown at 22 °C in long days. A typical WT flower is shown as an insert in the upper left panel. Representative flowers for 3 independent *AP1::AP<sup>LAP1</sup>* lines are presented and one representative flower from *AP1::AG* and *AP1::AP1* expressing lines. While the first whorl in *ap1-7* is replaced by bract or stipule with axillary buds and petals are missing in the second whorl, *AP1::AG<sup>LAP1</sup>* expression restores WT first and second whorl organs, while *AG* expression triggers carpel development in the first whorl and absence of petals in the second whorl. Scales bars = 1 mm.

360  
361 In these plants, whorl 1 of each flower was made of four sepal-like organs and axillary  
362 buds were never observed as opposed to the *ap1-7* mutant (**Figure 6 and 7**). In addition,  
363 between 66% to 82% of the flowers in three independent lines homozygous for the transgene  
364 showed 4 petal-like organs (**Figure 6 and 7**). Scanning electron microscopy (SEM)  
365 observations of epidermal cells from whorls 1 and 2 of *AG<sup>LAP1</sup>* expressing lines showed  
366 elongated cells characteristic of sepals and conical cells characteristic of petals, respectively  
367 (**Figure 7 and Supplementary Figure 7**). Detailed inspection of sepal and petal surfaces by  
368 SEM from the *AG<sup>LAP1</sup>* expressing plants revealed the presence of a few clusters of leaf-like and  
369 stamen identity cells in whorls 1 and 2, respectively (**Figure 7 and Supplementary Figure 8**).  
370 In these 3 lines, 10 to 25% of the flowers showed petals with only petal identity cells while 75  
371 to 90% of the flowers show at least one petal with a small cluster of stamen identity cells  
372 (**Supplementary Figure 8**). This indicates incomplete complementation of *AP1* function by  
373 the chimera. However, *AP1:AG* was unable to even partially complement *AP1* function in the  
374 first and second whorl. Inspection of the cell surface in *ap1-7 AP1:AG* plants of the first whorl  
375 showed characteristic carpel cells (replum, style and papilla) and an absence of organs in the

376 second whorl (**Supplementary Figure 6**).  $AG^{IAP1}$  therefore possesses the ability to trigger  $API$   
377 specific developmental programs and has lost much of its ability to trigger  $AG$ -specific organ  
378 development, indicating that the I domain of  $API$  plays a major role in conferring  $API$   
379 functional identity to  $AG^{IAP1}$  *in vivo*.

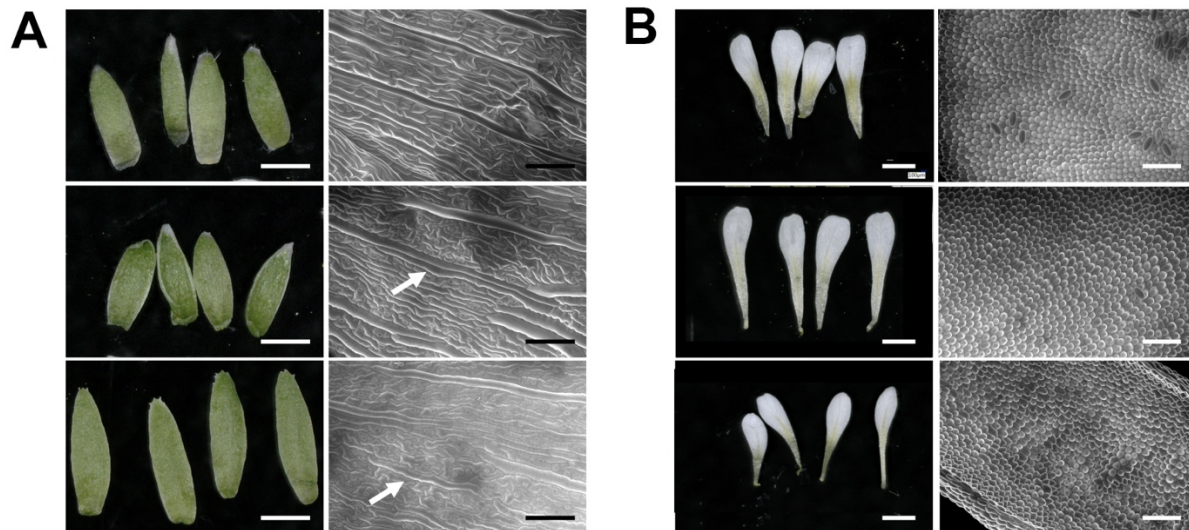

380  
381 **Figure 7. First and second whorls cell identity are complemented in  $ap1-7$  plants expressing  $AG^{IAP1}$ .** First (A) and second  
382 (B) whorl organs were removed from WT, and flowers from  $API$  or  $AG^{IAP1}$  expressing  $ap1-7$  plants. First whorl organs in  
383  $AG^{IAP1}$  expressing plants are slightly longer compared to WT and  $API$  expressing plants (A, left panel). Second whorl organs  
384 in  $AG^{IAP1}$  expressing plants are slightly smaller compared to WT and  $API$  expressing plants (B, left panel). Epidermal cell  
385 identity, observed by SEM, show characteristic WT elongated sepal cells in  $API$  and  $AG^{IAP1}$  expressing plants (A, right panel)  
386 and characteristic WT conical cells in petals from  $API$  and  $AG^{IAP1}$  expressing plants (B, right panel). A small number of  
387 epidermal cells typical of leaves are also seen in  $AG^{IAP1}$  expressing plants and to a lesser extent in  $API$  expressing plants  
388 (arrow). Scale bars indicate 100  $\mu$ m for SEM images and 1 mm for organ photographs.

## 389 Discussion

390 Transcription factor function depends on its selective binding of specific sequences in  
391 the genome. The MADS TF family has dramatically expanded in the green lineage over the  
392 course of evolution and fulfills many roles throughout the lifecycle of the plant. MADS  
393 constitute one of the largest plant TF families and are almost evenly divided into two types, I  
394 and II, represented structurally by SRF and MEF2. The MADS-box DBD, encoded by a single  
395 exon, is either SRF-like or MEF2-like and exhibits little sequence variation even amongst  
396 different eukaryotic kingdoms of life. How the MADS TF family is able to regulate diverse  
397 developmental processes and different target genes with such a highly conserved DBD has been  
398 a fundamental question leading to the speculation that regions distal to the DBD may play a  
399 role in DNA-binding specificity either via the formation of higher order complexes, the  
400 recruitment of ternary factors or via allosteric alterations in DNA-binding specificity of the  
401 MADS-box domain.

402 Domain swap experiments performed over 25 years ago suggested that the I domain

403 played a key role in DNA-binding specificity and dimerization in floral organ identity MADS  
404 TFs, although the mechanism of this was unclear<sup>29,43,48</sup>. Based on the *in vitro* and *in vivo* data  
405 presented here, the I region or I domain should be considered as a fundamental component of  
406 the DNA-binding module as it is essential for DNA-binding for both type I and II MADS TFs.  
407 Examination of the structure of the MI domains of SEP3 in comparison with MEF2 and SRF  
408 coupled with secondary structure predictions, reveals that the I region is always alpha helical  
409 and interacts extensively with the beta sheet of the M domain, albeit with different orientations.  
410 This suggests that allosteric effects of the I region in type I and II MADS TFs, due to variability  
411 in amino acid composition, length and secondary structure orientation, will influence the  
412 MADS-domain conformation and tune DNA-binding and specificity. In addition, the I region  
413 alters dimer partner specificity, altering the repertoire of heteromeric MADS complexes able to  
414 be formed and resulting in additional functional diversity *in vivo*.

415 With the introduction of the floral quartet model, the role of the I domain in determining  
416 MADS TF function specificity was supplanted by the importance of specific tetramer  
417 components triggering DNA-looping as being required for gene regulation<sup>24</sup>. Tetramerisation  
418 allows cooperative two-site binding and looping of DNA, thus selecting for DNA-binding sites  
419 that exhibit preferred spacing<sup>31,34,49,50</sup>. Examination of a tetramerisation mutant of SEP3  
420 revealed that fourth whorl carpel development and meristem determinacy require efficient  
421 tetramerisation of SEP3<sup>33</sup>. Recent studies comparing the genome-wide binding patterns of  
422 tetrameric versus dimeric SEP3-AG complexes have further shown that tetramerisation both  
423 increases binding affinity and plays a role in determining DNA-binding specificity via  
424 preferential binding of specific intersite distances<sup>32</sup>. Comparisons of genome-wide binding of  
425 SEP3-AG and SEP3-AG<sup>IAPI</sup>, presented here, reveals that the I domain alters preferred intersite  
426 spacing between CArG-type binding sites. These data suggest a role of the I domain as a  
427 modulator of tetramerisation and highlight an additional mechanism mediated by the I domain  
428 for changing DNA binding patterns of MADS TF complexes.

429 The recruitment of ternary factors, non-MADS family protein partners, has been  
430 postulated to be a major determinant of DNA-binding specificity<sup>51</sup>. Based on yeast 2-hybrid  
431 screening, mass spectrometry and pulldown assays, additional TF partners from the NF-Y and  
432 homeodomain families as well as the orphan TF, LEAFY, have been identified for a few type  
433 II MADS TFs including OsMADS18 from rice and SHATTERPROOF, SEEDSTICK, AG and  
434 SEP3 from Arabidopsis<sup>25,48,52,53</sup>. While ternary complex formation likely plays a role in  
435 differential gene regulation, the formation of such complexes has only been shown for a  
436 relatively small number of MADS TFs and how much it accounts for the diversity of function



437 in the MADS TF family requires further studies. As shown here, swapping the I domain of the  
438 well-studied floral organ identity MADS TF, AP1 (first and second whorl organs) into the third  
439 and fourth whorl specific TF, AG, results in strong complementation of the *apl* loss of function  
440 phenotype by the chimeric construct. The experiments keep the K and C-terminal domains of  
441 AG intact and these domains have been postulated to be important for neo-functionalization<sup>54</sup>  
442 and/or the recruitment of ternary factors<sup>55</sup>. We cannot completely exclude that ternary factors  
443 recruited via the I domain could be responsible for the *API*-like activity of *AG<sup>IAP1</sup>* in planta.  
444 For example, OsMADS18 uses the MI domains to recruit OsNF-YB1 based on yeast 2-hybrid  
445 assays<sup>48</sup>. However, it is more likely that the combination of tuning DNA-binding specificity  
446 and heterodimer partner selection by the I domain accounts for the majority of AP1 activity of  
447 the *AG<sup>IAP1</sup>* chimera.

448 Based on the *in vitro* and *in vivo* experiments presented here, the I region is absolutely  
449 required for DNA-binding with the minimal DNA binding domain consisting of the M plus the  
450 I region, as opposed to the M domain alone. As shown here, the I domains of AP1 and AG also  
451 play an important role in DNA-binding and dimerization specificity. The I domain is able to  
452 tune the function of plant MADS TFs and, in the case of AP1, acts as a major determinant of  
453 functional identity in concert with the M domain. Further experiments will be required to  
454 determine how generalizable these results are to the wider MADS TF family (type I and II) and  
455 whether the I region broadly acts as a primary factor in MADS TF functional identity *in planta*.

## 456 **Methods**

457

### 458 **SEP3 MI domain protein expression and purification**

459 SEP3 MI (aa 1-90) was cloned into the pETM41 vector using the NcoI-NotI restriction sites to  
460 obtain His6-MBP translational protein fusion. Recombinant SEP3 MI protein was expressed in  
461 *E. coli* BL 21 Codon Plus cells. Cells were grown at 37 °C to an OD<sub>600</sub> of 0.8-1 after which time  
462 the temperature was reduced to 15 °C and protein expression induced by addition of 1 mM of  
463 IPTG for 12 h. Cells were harvested by centrifugation and the cell pellet resuspended in 25 mM  
464 KH<sub>2</sub>PO<sub>4</sub> pH 7 buffer containing 10 % glycerol, 500 mM NaCl, 2 mM Tris(2-  
465 carboxyethyl)phosphine (TCEP) and cOmplete protease inhibitors (Roche). Cells were lysed  
466 by sonication and cell debris pelleted at 25,000 rpm for 40 min. The soluble fraction was applied  
467 to a 1 ml Ni-NTA column and the protein eluted with resuspension buffer + 200 mM imidazole.  
468 The protein was dialysed against 25 mM Tris, pH 8.0, 300 mM NaCl and 1 mM TCEP. The  
469 protein was then applied to a heparin column to remove any bound DNA using a salt gradient  
470 from 300 mM to 2 M NaCl. The protein was dialysed overnight in the presence of TEV protease  
471 (10:1) to cleave the His-MBP tag at 4 °C. The protein was then passed over a Ni-NTA column  
472 to deplete the His-MBP and any uncleaved protein. A second heparin column was run to remove  
473 any His-MBP and to obtain pure SEP3 MI. The protein was concentrated to ~6 mg/ml and used  
474 for crystallization trials.

475

### 476 **Protein crystallization, data collection and refinement**

477 SEP3 MI at a concentration of 6 mg/ml was mixed at a 1:1 ratio with potassium sodium tartrate  
478 tetrahydrate (0.2 M), bis-tris propane (0.1 M, pH 7.5) and 20 % PEG 3350. The protein  
479 crystallized over 20 d at 4 °C forming a diamond shaped single crystal. 15 % glycerol was used  
480 as a cryoprotectant and the crystal flash frozen in liquid N<sub>2</sub>. Diffraction data were collected at  
481 100 K at the European Synchrotron Radiation Facility (ESRF), Grenoble France on ID29 at a  
482 wavelength of 1.0 Å. Indexing was performed using MXCube<sup>56</sup> and the default optimized  
483 oscillation range and collection parameters used for data collection. The data set was integrated  
484 and scaled using the programs *XDS* and *XSCALE*<sup>57</sup>. Data collection and refinement statistics  
485 are given in Table 1. The structure is deposited under PDB code 7NB0.

486

### 487 **In vitro pull-down assays**

488 The following constructs from type I and type II MADS TFs are cloned into pTnT vector for in  
489 vitro pulldown assays. Type I MADS TFs include AGL61<sup>MI</sup>(63-122)-5MyC, AGL61<sup>MI</sup>(63-  
490 155)-5MyC, PHE<sup>MI</sup>(1-60)-3FLAG, PHE<sup>MI</sup>(1-95)-3FLAG, AGL80<sup>MI</sup>(1-61)-3FLAG and  
491 AGL80<sup>MI</sup>(1-88)-3FLAG, and type II MADS TFs include SEP3<sup>MI</sup>(1-57)-3FLAG, SEP3<sup>MI</sup>(1-90)-  
492 3FLAG, AG<sup>MI</sup>(1-73)-5MyC, AG<sup>MI</sup>(1-107)-5MyC, AG(ΔN)<sup>MI</sup>(17-73)-5MyC, AG(ΔN)<sup>MI</sup>(17-  
493 107)-5MyC, AP1<sup>MI</sup>(1-57)-5MyC and AP1<sup>MI</sup>(1-92)-5MyC. Proteins were produced using in  
494 vitro transcription and translation system using wheat germ extract following manufactures'  
495 instructions (SP6 High Yield Expression System from Promega). Briefly, purified plasmids  
496 were used as input in a 2 hr 25 °C incubation reaction. For single input reactions, 1 μg of  
497 plasmid was used in a 25 μl reaction volume. For double input reactions, 1 μg plasmid of each  
498 construct was used in a 25 μl reaction volume. 10 % of each input reaction (i.e. 2.5 μl) was  
499 used as input for western blots. The rest of the reaction was used for pull-down experiments.  
500 Briefly, each reaction was completed to 100 μl using PBS buffer (150 mM sodium phosphate,  
501 pH 7.2, and 150 mM NaCl), and added with 10 μl of the appropriate magnetic beads (anti-MyC  
502 beads, Thermo Fisher or anti-FLAG beads, Merck Millipore) and incubated for 1 hr at 4 °C.  
503 The beads plus protein solution suspension was then placed on magnets, and the supernatant  
504 was discarded. The beads were washed with PBS buffer four times, and SDS-PAGE loading  
505 dye was added to the beads and boiled for 5 min. at 95 °C. Western blots were used to assess  
506 the pulldown results using anti-MyC (Thermo Fisher) and anti-FLAG antibodies (Merck  
507 Millipore).

508

### 509 **EMSA experiments**

510 Proteins for EMSAs experiments were produced as described above. EMSAs were performed  
511 as described with 10 nM DNA labeled with Cy5 (Eurofins) using a 103-bp DNA fragment  
512 containing 2 CARG boxes belonging to the *SEP3* promoter<sup>33</sup>. For each EMSA, a negative  
513 control was run, labeled 'DNA alone' in which the in vitro translation assay was done with  
514 pTNT vector without any insert and incubated with the DNA probe.

515

### 516 **Yeast two-hybrid screening**

517 AP1, AG and the chimeric construct, AG<sup>IAP1</sup>(residues 74-107 of AG replaced by residues 58-  
518 92 of AP1) were cloned into pENTR/D-TOPO® (Kan) gateway entry vector. Subsequently,  
519 Gateway LR reactions were performed using pDEST32 (pBDGAL4) and pDEST22  
520 (pADGAL4) destination vectors. The resulting pDEST32-AG, pDEST32-AP1 or pDEST32-  
521 AG<sup>IAP1</sup> expression construct was transformed into yeast strain PJ69-4α, and pDEST22-AG,  
522 pDEST22-AP1 or pDEST22-AG<sup>IAP1</sup> into PJ69-4A, followed by an autoactivation screen for the  
523 bait vector as described<sup>58</sup>. Upon confirmation that the AG<sup>IAP1</sup> bait did not possess any  
524 autoactivation capacity, a matrix-based Y2H screening was performed following the protocol  
525 described in<sup>58</sup>. Bait and prey clones of all native Arabidopsis type II MIKC<sup>c</sup> MADS TFs were  
526 generated previously<sup>14</sup> and were screened against AP1, AG and AG<sup>IAP1</sup>. Growth of yeast and

527 hence, protein-protein interaction events, were scored after seven days of incubation at 20 °C  
528 on selective medium. Three different selective media were used: SD lacking Leucine,  
529 Tryptophan, and Histidine (-LWH) and supplemented with 1 mM 3-Amino-1,2,4-triazole (3-  
530 AT); SD -LWH + 5 mM 3-AT and SD lacking L,W and Adenine (-LWA). Mating was  
531 performed twice in independent experiments and only combinations of MADS TFs giving  
532 growth on all three selection media and in both replica were scored as interaction events.  
533

### 534 **Seq-DAP-seq**

535 Seq-DAP-seq for SEP3-AG<sup>IAP1</sup> complex was performed as described previously<sup>32</sup>. Briefly, 2 µg  
536 of each purified plasmid (pTnT-SEP3-3FLAG and pTnT- AG<sup>IAP1</sup>-5MyC) were used as input in  
537 a 50 µl TnT reaction incubated at 25 °C for 2 hr (Promega). The reaction solution was then  
538 combined with 50 µl IP buffer (PBS supplemented with 0.005 % NP40 and proteinase inhibitors  
539 (Roche)) and mixed with 20 µl anti-FLAG magnetic beads (Merck Millipore). Following 1 hr.  
540 incubation at room temperature, the anti-FLAG magnetic beads were immobilized, and washed  
541 three times with 100 µl IP buffer. Protein complexes were eluted with 100 µl IP buffer  
542 supplemented with 200 µg/ml 3xFLAG peptide (Merck Millipore). The eluted protein was then  
543 immobilized on anti-c-Myc magnetic beads (Thermo Fisher) and washed three times with 100  
544 µl IP buffer to isolate homogeneous SEP3-AG<sup>IAP1</sup> complex. The purified protein complex, while  
545 still bound on anti-c-Myc magnetic beads, was incubated with 50 ng DAP-seq input library pre-  
546 ligated with Illumina adaptor sequences. The reaction was incubated for 90 mins, and then  
547 washed 6 times using 100 µl IP buffer. The bound DNA was heated to 98 °C for 10 min and  
548 eluted in 30 µl EB buffer (10 mM Tris-Cl, pH 8.5). The eluted DNA fragments were PCR  
549 amplified using Illumina TruSeq primers for 20 cycles, and purified by AMPure XP beads  
550 (Beckman). The libraries were quantified by qPCR, pooled and sequenced on Illumina HiSeq  
551 (Genewiz) with specification of paired-end sequencing of 150 cycles. Each library obtained 10  
552 to 20 million reads. The seq-DAP-seq was performed in triplicate.  
553

### 554 **Seq-DAP-seq data analysis**

#### 555 *Reads processing and peak calling*

556 SEP3-AG and SEP3-AG<sup>IAP1</sup> reads processing and peak calling was performed as previously  
557 described<sup>32</sup>. Briefly, reads were checked using FastQC  
558 (<http://www.bioinformatics.babraham.ac.uk/projects/fastqc/>) and adapter sequences removed  
559 with NGmerge<sup>59</sup> and mapped with bowtie2<sup>60</sup> onto the TAIR10 version of the *A. thaliana*  
560 genome (www.arabidopsis.org), devoid of the mitochondrial and the chloroplast genomes. The  
561 duplicated reads were removed using the samtools rmdup program<sup>61</sup>. The resulting alignment  
562 files for each sample were input to MACS2<sup>62</sup> to call peaks using the input DNA as control.  
563 Consensus peaks between replicates were defined using MSPC<sup>63</sup> (P-value cutoff = 10<sup>-4</sup>) for  
564 each experiment. Each consensus peak was scanned for possible subpeaks, split into several  
565 peaks if needed, and the peak widths were then re-sized to ± 200 bp at both side of the peak  
566 maximal height. For all the resulting peaks, coverage was computed as the mean of the  
567 normalized read coverage for each replicate. This normalized coverage defines the binding  
568 intensity of a heterocomplex at a bound region.  
569

#### 570 *Comparison between SEP3-AG and SEP3-AG<sup>IAP1</sup>*

571 SEP3-AG or SEP3-AG<sup>IAP1</sup> were merged according to the following procedure: peaks were  
572 considered common if at least 80 % of two peaks overlapped with < 50 % of either peak non-  
573 overlapping. Peaks that did not overlap by > 50 % of their length were considered new peaks.  
574 These values were chosen empirically based on visual inspection of the peaks in the Integrated  
575 Genome Browser<sup>64</sup>. The averaged normalized coverage from each experiment, divided by the  
576 peak size, was computed for each peak. Figure 4 was computed using R

577 (<https://www.Rproject.org>) and the ggplot library<sup>65</sup>. The coverage fold reduction (CFR) was  
578 computed as the ratio between the mean normalized coverages in SEP3–AG<sup>IAP1</sup> and SEP3–AG  
579 seq-DAP-seq. The top 15 % sequences with extremes CFR were considered SEP3–AG<sup>IAP1</sup> and  
580 SEP3–AG specific and used to search for differential DNA patterns that potentially direct  
581 transcription factor differential binding using sequence modelling (see next paragraph).  
582 Detection of preferred spacings between canonical CA<sub>n</sub>G boxes was performed as in <sup>32</sup>.

583  
584 *Position weight matrices (PWM), transcription factor flexible model (TFFM) and k-mer set*  
585 *memory (KSM).*

586 For each experiment, PWM, TFFM and KSM models were reconstructed out of the 600 best  
587 peaks (judged according to their averaged coverage). PWM were generated by the meme-suite,  
588 using meme-chip<sup>66</sup> with options -meme-minw 16, -mememaxw 16, -meme-nmotifs 1 –meme-  
589 pal. TFFM were generated using the TFFM-framework package and the PWM obtained in the  
590 meme-chip output <sup>67</sup>. KSM is a recently developed TF binding motif representation that consist  
591 of a set of aligned k-mers that are overrepresented at TF binding sites. KSM were generated  
592 using the KMAC tool <sup>45</sup> with options set to search k-mers, with size ranging from 4 to 20bp in  
593 a 300bp sliding windows, that are enriched compare to TF unbound sequences. TF binding sites  
594 were predicted by searching the PWM, TFFM and KSM models against TF bound sequences  
595 and unbound sequences. PWM and TFFM scan was performed using in house scripts. KSM  
596 were searched using the KSM tool <sup>45</sup>. The best TFFM/PWM scores and the sum of KSM scores  
597 (because distinct KSM can hit to a same subject sequence) obtained for each bound regions and  
598 for unbound regions are retained to assess the prediction power of each model in an AUROC  
599 (Area Under the Receiver Operating Characteristic Curve). In this assessment, the unbound set  
600 of regions are chosen with similar GC content, size, and origin (promoter, intron, exon and  
601 intergenic) than the set of bound regions <sup>68</sup>. The set of unbound sequences fed to KMAC to  
602 detect enriched k-mer is different than the one used to evaluate the KSM model prediction.

603

#### 604 **Plant material and growth conditions**

605 All experiments were performed using *A. thaliana* Col-0 accession. *Ap1-7* allele was obtained  
606 from cal/cal all-7 plants kindly provided by Justin Goodrich and the *apl-11* (N6231) mutant  
607 was ordered from the Nottingham Arabidopsis Stock Centre. Seedlings were grown in  
608 controlled growth chambers in long day conditions (16 h light / 8 h dark) at 22 °C for plant  
609 transformation and phenotype analysis. WT, *apl* mutant and complemented lines were always  
610 grown in parallel.

611

#### 612 **Plasmid constructs for plant transformation**

613

614 Constructs used for the primary transformant phenotypic analysis were cloned into a modified  
615 version of pMDC32 binary vector<sup>69</sup>, where the 2x35S promoter was replaced with the *API*  
616 promoter. *AG<sup>MAP1</sup>*, *AG<sup>MIAP1</sup>*, *AG<sup>MIKAP1</sup>*, *AG<sup>KCAP1</sup>*, *AG<sup>CAP1</sup>*, *API<sup>IAG</sup>* and *AG<sup>IAP</sup>* coding sequences  
617 were amplified from pTNT-*AG<sup>MAP1</sup>*, pTNT-*AG<sup>MIAP1</sup>*, pTNT-*AG<sup>MIKAP1</sup>*, pTNT-*AG<sup>KCAP1</sup>*, pTNT-  
618 *AG<sup>CAP1</sup>*, pTNT-*API<sup>IAG</sup>* and pTNT-*AG<sup>IAP</sup>* vectors and subsequently inserted by XbaI restriction  
619 enzyme downstream of the *API* promoter. pTNT-CDS vectors were generated through Gibson  
620 assembly (NEB).

621

622 *API::API*, *API::AG* and *API::AG<sup>IAP1</sup>* vectors were generated using Gibson assembly in the  
623 vector backbone pFP100<sup>70</sup>. *API* promoter and *OCT* terminator were PCR amplified from pML-  
624 BART-AP1pro:AP1-AR plasmid<sup>71</sup>. *API*, *AG* and *AG<sup>IAP1</sup>* coding sequences were amplified  
625 from pTNT-*API*, pTNT-*AG*, pTNT- *AG<sup>IAP1</sup>* vectors.

626

627 **Plant transformation and floral phenotype analysis**

628

629 All the plant transformations were performed using *apl* mutant plants following the floral dip  
630 method<sup>72</sup>. For primary resistant analysis in *apl-11* intermediate allele, T1 seeds were sown on  
631 the 0.5X MS medium supplemented with 20 µg/ml hygromycin. Resistant plants were  
632 transferred to soil. Flowers arising from the primary shoot were analyzed by light microscopy.  
633 For the detailed analysis of the *API::API*, *API::AG* and *API::AG<sup>API</sup>*, the strong allele *apl-7*  
634 was used as transformation background and T1 seeds were selected based on the seed specific  
635 GFP selection marker<sup>70</sup>. Flower phenotypic analyses were performed by light microscopy on  
636 flower number ~10 to 19 based on their order of emergence on more than 20 T1 plants for each  
637 construct, growing in parallel to *apl-7* plants. Three independent lines with one insertion  
638 expressing *AG*, *API* and *AG<sup>API</sup>* were selected for further phenotype analyses.

639

640

641 **Environmental scanning electron microscopy**

642

643 SEM experiments were performed at the Electron Microscopy facility of the ICMG Nanobio-  
644 Chemistry Platform (Grenoble, France) as described<sup>33</sup>.

645

646

647 **Table 1.**

648

649 **Data collection and refinement statistics**

650

|                                                         | SEP3 <sup>M1</sup>        |
|---------------------------------------------------------|---------------------------|
| <b>Data collection</b>                                  |                           |
| Space group                                             | C222 <sub>1</sub>         |
| Cell dimensions                                         |                           |
| <i>a</i> , <i>b</i> , <i>c</i> (Å)                      | 67.4, 67.4, 122.6         |
| $\alpha$ , $\beta$ , $\gamma$ (°)                       | 90, 90, 90                |
| Resolution (Å)                                          | 48.-2.10 (2.16-2.10) *    |
| <i>R</i> <sub>sym</sub> or <i>R</i> <sub>merge</sub>    | 8.4 (130)                 |
| <i>CC</i> <sub>1/2</sub>                                | 99.8 (56.4)               |
| Completeness (%)                                        | 99.0 (95.6)               |
| Redundancy                                              | 6.0 (4.1)                 |
| <b>Refinement</b>                                       |                           |
| Resolution (Å)                                          | 47.7-2.10                 |
| No. reflections                                         | 16519                     |
| <i>R</i> <sub>work</sub> / <i>R</i> <sub>free</sub> (%) | 20.4/23.6<br>(32.8/34.2)* |
| No. atoms                                               | 1880                      |
| Protein                                                 | 1814                      |
| Ligand/ion                                              | 0                         |
| Water                                                   | 66                        |
| <i>B</i> -factors                                       |                           |
| Protein                                                 | 55.5                      |
| Water                                                   | 53.6                      |
| R.m.s. deviations                                       |                           |
| Bond lengths (Å)                                        | 0.008                     |
| Bond angles (°)                                         | 1.24                      |

651

652

653

- refers to highest resolution shell

654

655

656

657

658

659

660

661

662

663

664

665

666

667

**References**

668

669

670

671

672

673

- 1 Passmore, S., Maine, G. T., Elble, R., Christ, C. & Tye, B. K. Saccharomyces cerevisiae protein involved in plasmid maintenance is necessary for mating of MAT alpha cells. *J Mol Biol* **204**, 593-606, doi:10.1016/0022-2836(88)90358-0 (1988).
- 2 Yanofsky, M. F. *et al.* The protein encoded by the Arabidopsis homeotic gene agamous resembles transcription factors. *Nature* **346**, 35-39, doi:10.1038/346035a0 (1990).

- 674 3 Sommer, H. *et al.* Deficiens, a homeotic gene involved in the control of flower  
675 morphogenesis in *Antirrhinum majus*: the protein shows homology to transcription  
676 factors. *EMBO J* **9**, 605-613 (1990).
- 677 4 Norman, C., Runswick, M., Pollock, R. & Treisman, R. Isolation and properties of  
678 cDNA clones encoding SRF, a transcription factor that binds to the c-fos serum  
679 response element. *Cell* **55**, 989-1003, doi:10.1016/0092-8674(88)90244-9 (1988).
- 680 5 Smaczniak, C., Angenent, G. C. & Kaufmann, K. SELEX-Seq: A Method to  
681 Determine DNA Binding Specificities of Plant Transcription Factors. *Methods Mol*  
682 *Biol* **1629**, 67-82, doi:10.1007/978-1-4939-7125-1\_6 (2017).
- 683 6 Martinez-Castilla, L. P. & Alvarez-Buylla, E. R. Adaptive evolution in the  
684 Arabidopsis MADS-box gene family inferred from its complete resolved phylogeny.  
685 *Proc Natl Acad Sci U S A* **100**, 13407-13412, doi:10.1073/pnas.1835864100 (2003).
- 686 7 Alvarez-Buylla, E. R. *et al.* An ancestral MADS-box gene duplication occurred before  
687 the divergence of plants and animals. *Proc Natl Acad Sci U S A* **97**, 5328-5333,  
688 doi:97/10/5328 [pii] (2000).
- 689 8 Pollock, R. & Treisman, R. Human SRF-related proteins: DNA-binding properties and  
690 potential regulatory targets. *Genes Dev* **5**, 2327-2341 (1991).
- 691 9 Huang, H., Mizukami, Y., Hu, Y. & Ma, H. Isolation and characterization of the  
692 binding sequences for the product of the Arabidopsis floral homeotic gene  
693 AGAMOUS. *Nucleic Acids Res* **21**, 4769-4776 (1993).
- 694 10 Wynne, J. & Treisman, R. SRF and MCM1 have related but distinct DNA binding  
695 specificities. *Nucleic Acids Res* **20**, 3297-3303, doi:10.1093/nar/20.13.3297 (1992).
- 696 11 Shiraishi, H., Okada, K. & Shimura, Y. Nucleotide sequences recognized by the  
697 AGAMOUS MADS domain of Arabidopsis thaliana in vitro. *Plant J* **4**, 385-398  
698 (1993).
- 699 12 Pellegrini, L., Tan, S. & Richmond, T. J. Structure of serum response factor core  
700 bound to DNA. *Nature* **376**, 490-498, doi:10.1038/376490a0 (1995).
- 701 13 De Bodt, S. *et al.* Genomewide structural annotation and evolutionary analysis of the  
702 type I MADS-box genes in plants. *J Mol Evol* **56**, 573-586, doi:10.1007/s00239-002-  
703 2426-x (2003).
- 704 14 de Folter, S. *et al.* Comprehensive interaction map of the Arabidopsis MADS Box  
705 transcription factors. *Plant Cell* **17**, 1424-1433, doi:tpc.105.031831 (2005).
- 706 15 Masiero, S., Colombo, L., Grini, P. E., Schnittger, A. & Kater, M. M. The emerging  
707 importance of type I MADS box transcription factors for plant reproduction. *Plant*  
708 *Cell* **23**, 865-872, doi:10.1105/tpc.110.081737 (2011).
- 709 16 Bemmer, M., Heijmans, K., Airoidi, C., Davies, B. & Angenent, G. C. An atlas of type I  
710 MADS box gene expression during female gametophyte and seed development in  
711 Arabidopsis. *Plant Physiol* **154**, 287-300, doi:pp.110.160770 (2010).
- 712 17 Saedler, H., Becker, A., Winter, K. U., Kirchner, C. & Theissen, G. MADS-box genes  
713 are involved in floral development and evolution. *Acta Biochim Pol* **48**, 351-358  
714 (2001).
- 715 18 Becker, A. & Theissen, G. The major clades of MADS-box genes and their role in the  
716 development and evolution of flowering plants. *Mol Phylogenet Evol* **29**, 464-489,  
717 doi:S1055790303002070 [pii] (2003).
- 718 19 Kaufmann, K., Melzer, R. & Theissen, G. MIKC-type MADS-domain proteins:  
719 structural modularity, protein interactions and network evolution in land plants. *Gene*  
720 **347**, 183-198, doi:S0378-1119(04)00762-0 (2005).
- 721 20 Kwantes, M., Liebsch, D. & Verelst, W. How MIKC\* MADS-box genes originated  
722 and evidence for their conserved function throughout the evolution of vascular plant  
723 gametophytes. *Mol Biol Evol* **29**, 293-302, doi:10.1093/molbev/msr200 (2012).

- 724 21 Adamczyk, B. J. & Fernandez, D. E. MIKC\* MADS domain heterodimers are  
725 required for pollen maturation and tube growth in Arabidopsis. *Plant Physiol* **149**,  
726 1713-1723, doi:10.1104/pp.109.135806 (2009).
- 727 22 Verelst, W., Saedler, H., Munster, T. MIKC\* MADS-Protein complexes Bind Motifs  
728 Enriched in the Proximal Region of Pollen-Specific Arabidopsis Promoters. *Plant*  
729 *Physiol* **143**, 447-460, doi:<https://doi.org/10.1104/pp.106.089805> (2007).
- 730 23 Immink, R. G. *et al.* SEPALLATA3: the 'glue' for MADS box transcription factor  
731 complex formation. *Genome Biol* **10**, R24, doi:gb-2009-10-2-r24 (2009).
- 732 24 Theissen, G. & Saedler, H. Plant biology. Floral quartets. *Nature* **409**, 469-471,  
733 doi:10.1038/35054172 (2001).
- 734 25 Smaczniak, C. *et al.* Characterization of MADS-domain transcription factor  
735 complexes in Arabidopsis flower development. *Proc Natl Acad Sci U S A* **109**, 1560-  
736 1565, doi:10.1073/pnas.1112871109 (2012).
- 737 26 Gramzow, L. & Theissen, G. A hitchhiker's guide to the MADS world of plants.  
738 *Genome Biol* **11**, 214, doi:gb-2010-11-6-214 (2010).
- 739 27 Smaczniak, C., Immink, R. G., Angenent, G. C. & Kaufmann, K. Developmental and  
740 evolutionary diversity of plant MADS-domain factors: insights from recent studies.  
741 *Development* **139**, 3081-3098, doi:10.1242/dev.074674 (2012).
- 742 28 Riechmann, J. L., Krizek, B. A. & Meyerowitz, E. M. Dimerization specificity of  
743 Arabidopsis MADS domain homeotic proteins APETALA1, APETALA3,  
744 PISTILLATA, and AGAMOUS. *Proc Natl Acad Sci U S A* **93**, 4793-4798,  
745 doi:10.1073/pnas.93.10.4793 (1996).
- 746 29 Krizek, B. A. & Meyerowitz, E. M. Mapping the protein regions responsible for the  
747 functional specificities of the Arabidopsis MADS domain organ-identity proteins.  
748 *Proc Natl Acad Sci U S A* **93**, 4063-4070, doi:10.1073/pnas.93.9.4063 (1996).
- 749 30 Riechmann, J. L. & Meyerowitz, E. M. Determination of floral organ identity by  
750 Arabidopsis MADS domain homeotic proteins AP1, AP3, PI, and AG is independent  
751 of their DNA-binding specificity. *Mol Biol Cell* **8**, 1243-1259,  
752 doi:10.1091/mbc.8.7.1243 (1997).
- 753 31 Jetha, K., Theissen, G. & Melzer, R. Arabidopsis SEPALLATA proteins differ in  
754 cooperative DNA-binding during the formation of floral quartet-like complexes.  
755 *Nucleic Acids Res* **42**, 10927-10942, doi:10.1093/nar/gku755 (2014).
- 756 32 Lai, X., Stigliani, A., Lucas, J., Hugouvieux, V., Parcy, F., Zubieta, C. Genome-wide  
757 binidng of SEPALLATA3 and AGAMOUS complexes dertermined by sequential  
758 DNA-affinity purification sequencing. *Nucleic Acids Res* **48**, 9637-9648,  
759 doi:10.1093/nar/gkaa729 (2020).
- 760 33 Hugouvieux, V. *et al.* Tetramerization of MADS family transcription factors  
761 SEPALLATA3 and AGAMOUS is required for floral meristem determinacy in  
762 Arabidopsis. *Nucleic Acids Res* **46**, 4966-4977, doi:10.1093/nar/gky205 (2018).
- 763 34 Puranik, S. *et al.* Structural basis for the oligomerization of the MADS domain  
764 transcription factor SEPALLATA3 in Arabidopsis. *Plant Cell* **26**, 3603-3615,  
765 doi:10.1105/tpc.114.127910 (2014).
- 766 35 Krissinel, E. & Henrick, K. Inference of macromolecular assemblies from crystalline  
767 state. *J Mol Biol* **372**, 774-797, doi:10.1016/j.jmb.2007.05.022 (2007).
- 768 36 Crooks, G. E., Hon, G., Chandonia, J-M., Brenner, S.E. WebLogo:a sequence logo  
769 generator. *Genome Res* **14**, doi:10.1101/gr.849004 (2004).
- 770 37 Bemmer, M., Wolters-Arts, M., Grossniklaus, U. & Angenent, G. C. The MADS  
771 domain protein DIANA acts together with AGAMOUS-LIKE80 to specify the central  
772 cell in Arabidopsis ovules. *Plant Cell* **20**, 2088-2101, doi:tpc.108.058958 (2008).



- 773 38 Steffen, J. G., Kang, I.-H., Portereiko, M. F., Lloyd, A. & Drews, G. N. AGL61  
774 Interacts with AGL80 and Is Required for Central Cell Development in Arabidopsis.  
775 *Plant Physiology* **148**, 259-268 (2008).
- 776 39 Pelaz, S., Gustafson-Brown, C., Kohalmi, S. E., Crosby, W. L. & Yanofsky, M. F.  
777 APETALA1 and SEPALLATA3 interact to promote flower development. *Plant J* **26**,  
778 385-394 (2001).
- 779 40 Kaufmann, K. *et al.* Target genes of the MADS transcription factor SEPALLATA3:  
780 integration of developmental and hormonal pathways in the Arabidopsis flower. *PLoS*  
781 *Biol* **7**, e1000090, doi:08-PLBI-RA-4384 (2009).
- 782 41 O'Maoileidigh, D. S. *et al.* Control of reproductive floral organ identity specification  
783 in Arabidopsis by the C function regulator AGAMOUS. *Plant Cell* **25**, 2482-2503,  
784 doi:10.1105/tpc.113.113209 (2013).
- 785 42 Mizukami, Y., Huang, H., Tudor, M., Hu, Y. & Ma, H. Functional domains of the  
786 floral regulator AGAMOUS: characterization of the DNA binding domain and  
787 analysis of dominant negative mutations. *Plant Cell* **8**, 831-845,  
788 doi:10.1105/tpc.8.5.831 (1996).
- 789 43 Riechmann, J. L., Wang, M. & Meyerowitz, E. M. DNA-binding properties of  
790 Arabidopsis MADS domain homeotic proteins APETALA1, APETALA3,  
791 PISTILLATA and AGAMOUS. *Nucleic Acids Res* **24**, 3134-3141, doi:6t0273 [pii]  
792 (1996).
- 793 44 Smaczniak, C., Muino, J. M., Chen, D., Angenent, G. C. & Kaufmann, K. Differences  
794 in DNA Binding Specificity of Floral Homeotic Protein Complexes Predict Organ-  
795 Specific Target Genes. *Plant Cell* **29**, 1822-1835, doi:10.1105/tpc.17.00145 (2017).
- 796 45 Guo, Y., Tian, K., Zeng, H., Gifford, D.K. A novel k-mer set memory (KSM) motif  
797 representation improves regulatory variant prediction. *Genome Res* **28**, 891-900,  
798 doi:10.1101/gr.226852.117 (2018).
- 799 46 Bowman, J. L., Alvarez, J., Weigel, D., Meyerowitz, E.M., Smyth, D.R. Control of  
800 Flower development in Arabidopsis thaliana by APETALA1 and interacting genes.  
801 *Development* **119**, 721-743 (1993).
- 802 47 Irish, V. F. & Sussex, I. M. Function of the apetala-1 gene during Arabidopsis floral  
803 development. *Plant Cell* **2**, 741-753, doi:10.1105/tpc.2.8.741 (1990).
- 804 48 Masiero, S. *et al.* Ternary complex formation between MADS-box transcription  
805 factors and the histone fold protein NF-YB. *J Biol Chem* **277**, 26429-26435,  
806 doi:10.1074/jbc.M202546200 (2002).
- 807 49 Mendes, M. A. *et al.* MADS domain transcription factors mediate short-range DNA  
808 looping that is essential for target gene expression in Arabidopsis. *Plant Cell* **25**,  
809 2560-2572, doi:10.1105/tpc.112.108688 (2013).
- 810 50 Melzer, R., Verelst, W. & Theissen, G. The class E floral homeotic protein  
811 SEPALLATA3 is sufficient to loop DNA in 'floral quartet'-like complexes in vitro.  
812 *Nucleic Acids Res* **37**, 144-157, doi:10.1093/nar/gkn900 (2009).
- 813 51 Davies, B., Sommer, H., Schwarz-Sommer, Z. *Flower Development: Genetic Views*  
814 *and Molecular News*. 167-184 (Springer Science and Business Media, 1999).
- 815 52 Brambilla, V. *et al.* Genetic and molecular interactions between BELL1 and MADS  
816 box factors support ovule development in Arabidopsis. *Plant Cell* **19**, 2544-2556,  
817 doi:10.1105/tpc.107.051797 (2007).
- 818 53 Liu, C., Xi, W., Shen, L., Tan, C. & Yu, H. Regulation of floral patterning by  
819 flowering time genes. *Developmental cell* **16**, 711-722,  
820 doi:10.1016/j.devcel.2009.03.011 (2009).

- 821 54 Vandebussche, M., Theissen, G., Van de Peer, Y. & Gerats, T. Structural  
822 diversification and neo-functionalization during floral MADS-box gene evolution by  
823 C-terminal frameshift mutations. *Nucleic Acids Res* **31**, 4401-4409 (2003).
- 824 55 Egea-Cortines, M., Saedler, H. & Sommer, H. Ternary complex formation between  
825 the MADS-box proteins SQUAMOSA, DEFICIENS and GLOBOSA is involved in  
826 the control of floral architecture in *Antirrhinum majus*. *EMBO J* **18**, 5370-5379,  
827 doi:10.1093/emboj/18.19.5370 (1999).
- 828 56 Gabadinho, J. *et al.* MxCuBE: a synchrotron beamline control environment  
829 customized for macromolecular crystallography experiments. *J Synchrotron Radiat*  
830 **17**, 700-707, doi:10.1107/S0909049510020005 (2010).
- 831 57 Kabsch, W. Integration, scaling, space-group assignment and post-refinement. *Acta*  
832 *Crystallogr D Biol Crystallogr* **66**, 133-144, doi:10.1107/S0907444909047374 (2010).
- 833 58 de Folter, S. a. I., R.G.H. in *Plant Transcription Factors. Methods in Molecular*  
834 *Biology (Methods and Protocols)* Vol. 754 (ed L. Yuan., Perry, S.) 145-165 (Humana  
835 Press, 2011).
- 836 59 Gaspar, J. M. NGmerge: merging paired-end reads via novel empirically-derived  
837 models of sequencing errors. *BMC Bioinformatics* **19**, 536, doi:10.1186/s12859-018-  
838 2579-2 (2018).
- 839 60 Langmead, B. & Salzberg, S. L. Fast gapped-read alignment with Bowtie 2. *Nat*  
840 *Methods* **9**, 357-359, doi:10.1038/nmeth.1923 (2012).
- 841 61 Li, H., Handsaker, B., Wysoker, A., Fennell, T., Ruan, J., Homer, N., Marth, G.,  
842 Abecasis, G., Durbin, R., 1000 Genome Project Data Processing Subgroup. The  
843 Sequence Alignment/Map format and SAMtools. *Bioinformatics* **25**, 2078-2079,  
844 doi:10.1093/bioinformatics/btp352 (2009).
- 845 62 Zhang, Y. *et al.* Model-based analysis of ChIP-Seq (MACS). *Genome Biol* **9**, R137,  
846 doi:10.1186/gb-2008-9-9-r137 (2008).
- 847 63 Jalili, V., Matteucci, M., Masseroli, M. & Morelli, M. J. Using combined evidence  
848 from replicates to evaluate ChIP-seq peaks. *Bioinformatics* **31**, 2761-2769,  
849 doi:10.1093/bioinformatics/btv293 (2015).
- 850 64 Freese, N. H., Norris, D. C. & Loraine, A. E. Integrated genome browser: visual  
851 analytics platform for genomics. *Bioinformatics* **32**, 2089-2095,  
852 doi:10.1093/bioinformatics/btw069 (2016).
- 853 65 Wickham, H. *ggplot2: Elegant Graphics for Data Analysis*. (Springer-Verlag 2016).
- 854 66 Bailey, T. L. *et al.* MEME SUITE: tools for motif discovery and searching. *Nucleic*  
855 *Acids Res* **37**, W202-208, doi:10.1093/nar/gkp335 (2009).
- 856 67 Mathelier, A. & Wasserman, W. W. The next generation of transcription factor  
857 binding site prediction. *PLoS Comput Biol* **9**, e1003214,  
858 doi:10.1371/journal.pcbi.1003214 (2013).
- 859 68 Stigliani, A. *et al.* Capturing Auxin Response Factors Syntax Using DNA Binding  
860 Models. *Mol Plant* **12**, 822-832, doi:10.1016/j.molp.2018.09.010 (2019).
- 861 69 Curtis, M. D. G., U. A Gateway Cloning Vector Set for High-throughput Functional  
862 Analysis of Genes in *Planta*. *Plant Physiol* **133**, 462-469 (2003).
- 863 70 Bensmihen, S. *et al.* Analysis of an activated ABI5 allele using a new selection  
864 method for transgenic *Arabidopsis* seeds. *FEBS Lett* **561**, 127-131,  
865 doi:10.1016/S0014-5793(04)00148-6 (2004).
- 866 71 O'Maoileidigh, D. S., Thomson, B., Raganelli, A., Wuest, S.E., Ryan, P.T.,  
867 Kwasniewska, K., Carles, C.C., Graciet, E., Wellmer, F. Gene network analysis of  
868 *Arabidopsis thaliana* flower development through dynamic gene perturbations. *The*  
869 *Plant Journal* **83**, 344-358 (2015).

870 72 Clough, S. J. & Bent, A. F. Floral dip: a simplified method for *Agrobacterium*-  
871 mediated transformation of *Arabidopsis thaliana*. *Plant J* **16**, 735-743 (1998).  
872  
873
